# Supplementary material for: Expression and prognosis analysis of mitochondrial ribosomal protein family in breast cancer
Source: PubMed Central journal article supplement (PMC9226049; doi:10.1038/s41598-022-14724-7), 2022-06-23

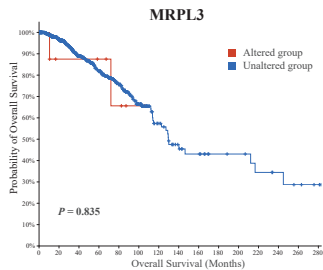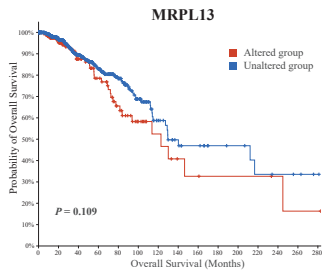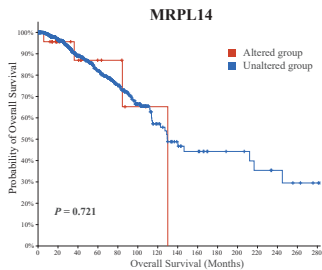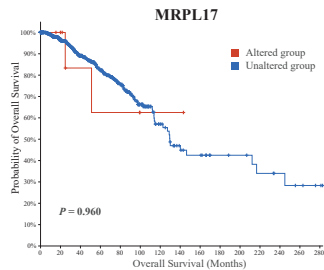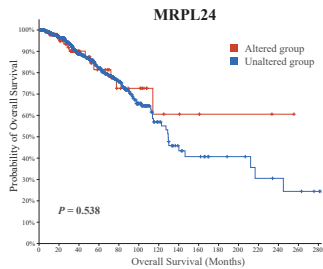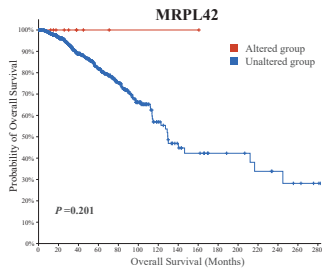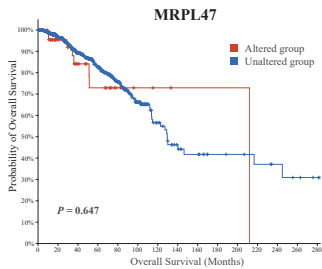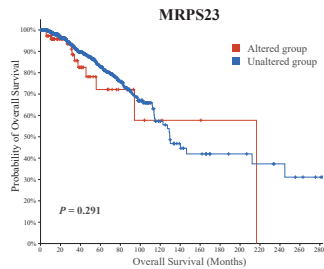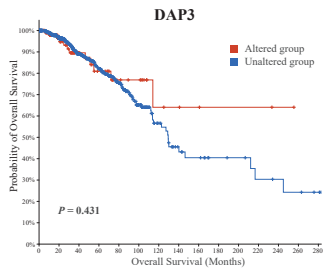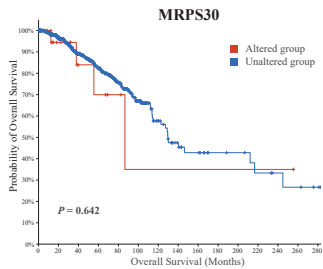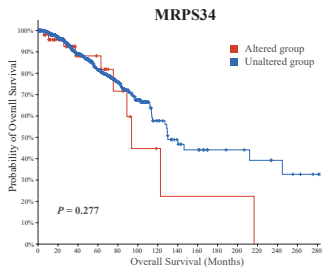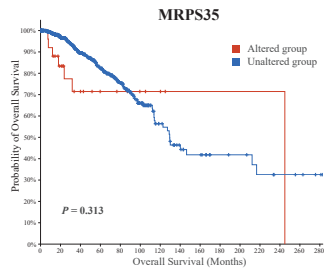

Supplement: 41598_2022_14724_MOESM3_ESM.pdf [file 41598_2022_14724_MOESM3_ESM.pdf]
